# Supplementary material for: Analysis of Endangered Andalusian Black Cattle (Negra Andaluza) Reveals Genetic Reservoir for Bovine Black Trunk
Source: MDPI journal article supplement (doi:10.3390/ani14071131), 2024-04-08

**Figure S2.** Andalusian Black Cattle Breed process of configuration, development and consolidation.

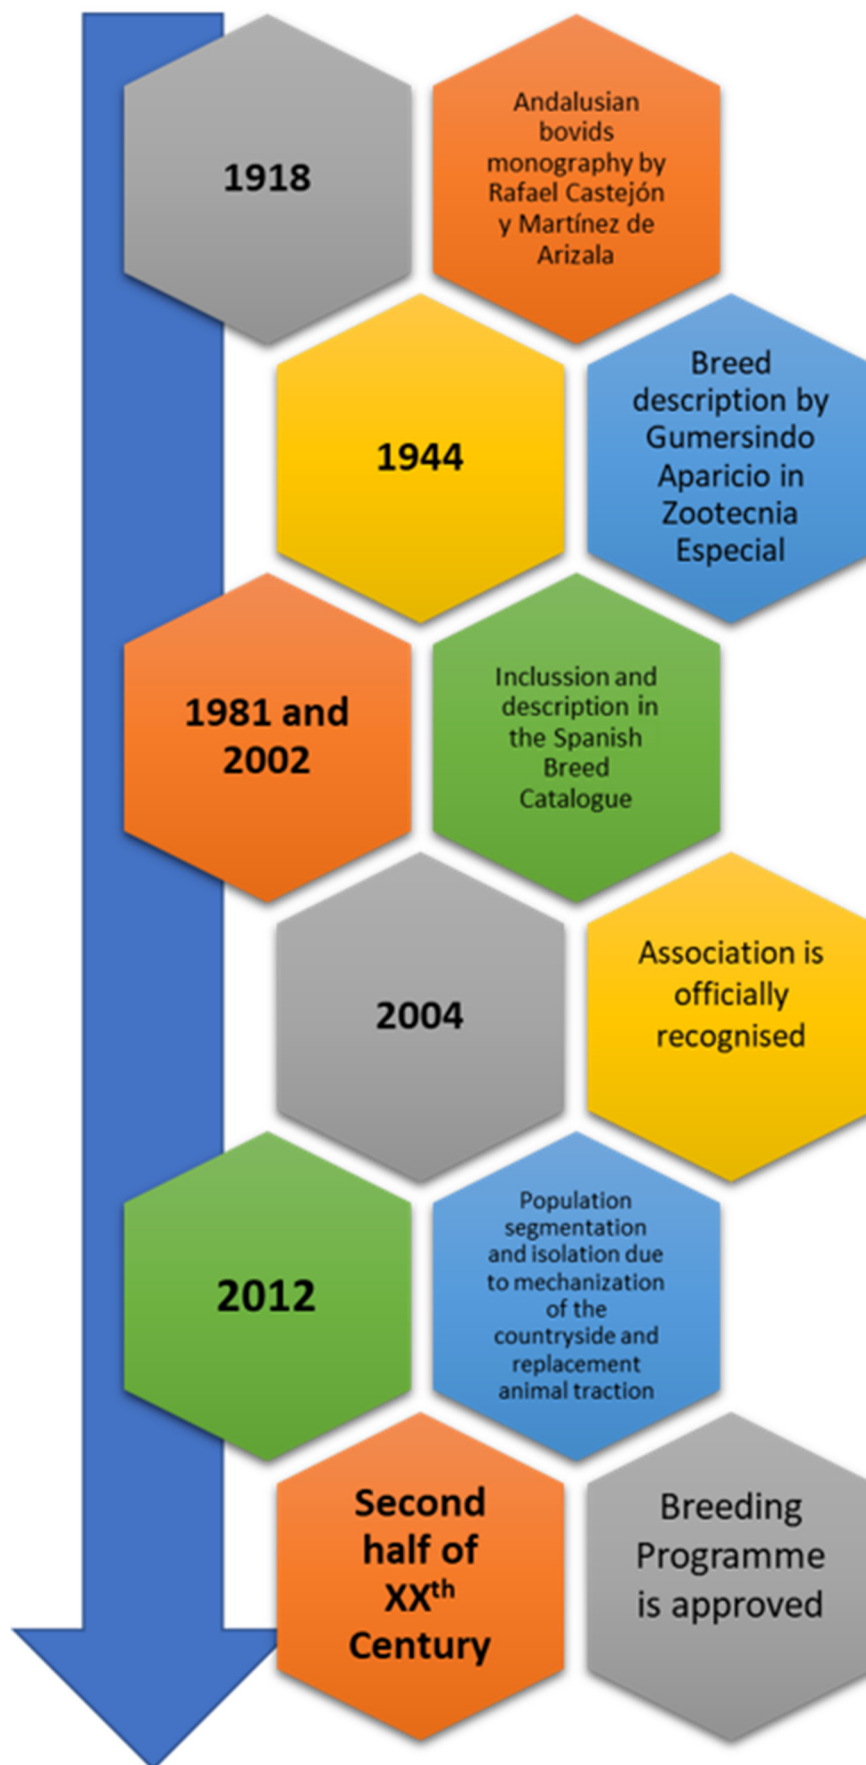

Supplement: s1 [file s1]
