# Supplementary material for: Analysis of Endangered Andalusian Black Cattle (Negra Andaluza) Reveals Genetic Reservoir for Bovine Black Trunk
Source: MDPI journal article supplement (doi:10.3390/ani14071131), 2024-04-08
Supplement: s1 [file s1]

**Supplementary Table S2.** Descriptive statistics of average age (years) of the parents at the birth of their offspring and generation intervals or generation length (years) for the four gametic routes in the Black Andalusian cattle.

| Average age (years) of the parents at the birth of their offspring                                                                                                                   |                                                               |                |                |                         |                        |       |
|--------------------------------------------------------------------------------------------------------------------------------------------------------------------------------------|---------------------------------------------------------------|----------------|----------------|-------------------------|------------------------|-------|
| Parameter<br>Population set                                                                                                                                                          | Mean age of the<br>parents at the birth of<br>their offspring | Sire to<br>son | Damr<br>to son | Sire to<br>daught<br>er | Dam to<br>daught<br>er | Total |
| Historical (n=8555)                                                                                                                                                                  | N                                                             | 3448           | 3559           | 3929                    | 4058                   | 14994 |
|                                                                                                                                                                                      | Mean                                                          | 6.18           | 5.81           | 6.15                    | 5.74                   | 5.97  |
|                                                                                                                                                                                      | SD                                                            | 2.86           | 3.09           | 2.90                    | 3.08                   | 2.99  |
|                                                                                                                                                                                      | SEM                                                           | 0.049          | 0.052          | 0.046                   | 0.049                  | 0.024 |
| Current (n=2472)                                                                                                                                                                     | N                                                             | 565            | 591            | 1835                    | 1877                   | 4868  |
|                                                                                                                                                                                      | Mean                                                          | 5.95           | 6.71           | 5.93                    | 5.96                   | 6.04  |
|                                                                                                                                                                                      | SD                                                            | 2.47           | 3.19           | 2.76                    | 3.04                   | 2.90  |
|                                                                                                                                                                                      | SEM                                                           | 0.104          | 0.134          | 0.116                   | 0.128                  | 0.042 |
| Generation intervals, generation length or average age (years) of the parents at birth of their offspring<br>that in their turn will produce the next generation of breeding animals |                                                               |                |                |                         |                        |       |
| Parameter<br>Population set                                                                                                                                                          | Gametic route                                                 | Sire to<br>son | Damr<br>to son | Sire to<br>daught<br>er | Dam to<br>daught<br>er | Total |
| Historical (n=8555)                                                                                                                                                                  | N                                                             | 62             | 72             | 1484                    | 1552                   | 3170  |
|                                                                                                                                                                                      | Mean                                                          | 5.91           | 5.06           | 5.95                    | 5.30                   | 5.61  |
|                                                                                                                                                                                      | SD                                                            | 2.98           | 3.04           | 2.91                    | 2.84                   | 2.90  |
|                                                                                                                                                                                      | SEM                                                           | 0.378          | 0.359          | 0.076                   | 0.072                  | 0.052 |
| Current (n=2472)                                                                                                                                                                     | N                                                             | 24             | 25             | 990                     | 1026                   | 2065  |
|                                                                                                                                                                                      | Mean                                                          | 5.71           | 6.25           | 5.86                    | 5.49                   | 5.68  |
|                                                                                                                                                                                      | SD                                                            | 3.04           | 3.13           | 2.85                    | 2.85                   | 2.87  |
|                                                                                                                                                                                      | SEM                                                           | 0.621          | 0.659          | 0.584                   | 0.583                  | 0.063 |
