# Supplementary material for: Analysis of Endangered Andalusian Black Cattle (Negra Andaluza) Reveals Genetic Reservoir for Bovine Black Trunk
Source: Animals (Basel). 2024 Apr 8;14(7):1131. doi: 10.3390/ani14071131 (PMC11010997; doi:10.3390/ani14071131)
Supplement: Supplementary file 1 [file animals-14-01131-s001.zip]

Archive with 4 entries (4 files):
- Figure S1.pdf
- Figure S2.pdf
- Supplementary Table S1.pdf
- Supplementary Table S2.pdf
